# Supplementary material for: An inter-island comparison of Darwin’s finches reveals the impact of habitat, host phylogeny, and island on the gut microbiome
Source: PLOS journal article supplement (doi:10.1371/journal.pone.0226432), 2019-12-13
Supplement: S4 (10.1371/journal.pone.0226432.s004) [file journal.pone.0226432.s004]

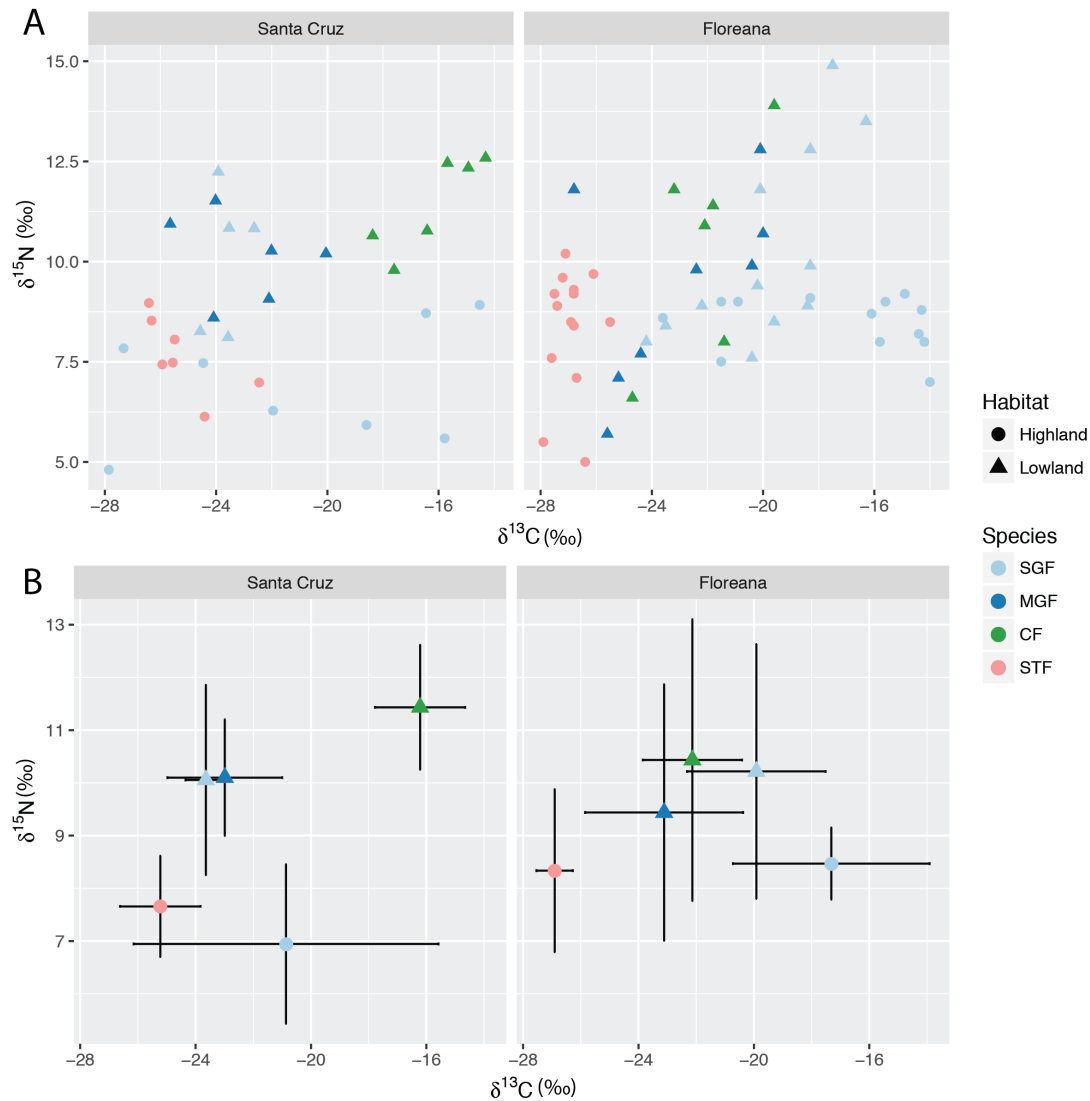

**S4 Fig.  $\delta^{13}\text{C}$  and  $\delta^{15}\text{N}$  stable isotope measurements for Darwin's finch species across Santa Cruz and Floreana islands.**

Point color and point shape indicate host species and habitat, respectively. The four species that are present on both islands are plotted. A) Individual  $\delta^{13}\text{C}$  and  $\delta^{15}\text{N}$  values for each finch with gut microbiome samples. B) Mean  $\delta^{13}\text{C}$  and  $\delta^{15}\text{N}$  values for each species and habitat with standard deviation. Three points were the only sample from that habitat and species combination and therefore lack standard deviation error bars: the medium ground finch in the highlands and the small tree finch in the lowlands on Santa Cruz in addition to the cactus finch in the highlands on Floreana.
