# Supplementary material for: An inter-island comparison of Darwin’s finches reveals the impact of habitat, host phylogeny, and island on the gut microbiome
Source: PLOS journal article supplement (doi:10.1371/journal.pone.0226432), 2019-12-13
Supplement: S13 (10.1371/journal.pone.0226432.s013) [file journal.pone.0226432.s013]

**S8 Table. Relative abundance of bacterial taxa in small ground finch samples from highland and lowland habitats on Floreana**

| <b>Phylum</b>       | <b>Highland</b> | <b>Lowland</b> |
|---------------------|-----------------|----------------|
| Firmicutes          | 69.5%           | 39.9%          |
| Proteobacteria      | 15.0%           | 18.2%          |
| Actinobacteria      | 13.8%           | 38.9%          |
| Unclassified        | 1.0%            | 1.3%           |
| Chloroflexi         | 0.2%            | 1.0%           |
| <b>Order</b>        | <b>Highland</b> | <b>Lowland</b> |
| Lactobacillales     | 67.8%           | 38.6%          |
| Actinomycetales     | 12.1%           | 28.6%          |
| Pseudomonadales     | 8.8%            | 3.4%           |
| Rhizobiales         | 4.3%            | 9.8%           |
| Unclassified        | 1.3%            | 2.2%           |
| Bacillales          | 1.3%            | 1.1%           |
| Solirubrobacterales | 1.2%            | 2.1%           |
| <b>Genus</b>        | <b>Highland</b> | <b>Lowland</b> |
| Lactobacillus       | 64.7%           | 38.4%          |
| Acinetobacter       | 8.3%            | 3.2%           |
| Unclassified        | 4.1%            | 7.7%           |
| Curtobacterium      | 2.8%            | 1.0%           |
| Methylobacterium    | 2.6%            | 2.0%           |
| Weissella           | 1.7%            | 0.0%           |
| Enterococcus        | 1.1%            | 0.1%           |
| Staphylococcus      | 1.0%            | 0.1%           |
